# Supplementary material for: Cost-effectiveness and budget impact analyses of dengue vaccination in Indonesia
Source: PubMed Central journal article supplement (PMC8384188; doi:10.1371/journal.pntd.0009664), 2021-08-12
Supplement: pntd.0009664.s001.pdf [file pntd.0009664.s001.pdf]

| <i>age</i> | <i>interval</i> | <i>m<sub>x</sub></i> | <i>q<sub>x</sub></i> | <i>p<sub>x</sub></i> | <i>l<sub>x</sub></i> | <i>d<sub>x</sub></i> | <i>L<sub>x</sub></i> | <i>T<sub>x</sub></i> | <i>e<sub>x</sub></i> | <i>a(x)</i> |
|------------|-----------------|----------------------|----------------------|----------------------|----------------------|----------------------|----------------------|----------------------|----------------------|-------------|
| [0,1)      | 1               | 0.0230               | 0.0348               | 0.9652               | 100,000              | 3,479                | 97,564               | 6,296,836            | 63.0                 | 0.5         |
| [1,5)      | 4               | 0.0010               | 0.0106               | 0.9894               | 96,521               | 1,027                | 413,944              | 6,199,272            | 64.2                 | 2.0         |
| [5,10)     | 5               | 0.0010               | 0.0082               | 0.9918               | 95,494               | 787                  | 475,501              | 5,785,328            | 60.6                 | 2.5         |
| [10,15)    | 5               | 0.0010               | 0.0072               | 0.9928               | 94,707               | 677                  | 471,840              | 5,309,827            | 56.1                 | 2.5         |
| [15,20)    | 5               | 0.0010               | 0.0103               | 0.9897               | 94,029               | 966                  | 467,733              | 4,837,987            | 51.5                 | 2.5         |
| [20,25)    | 5               | 0.0015               | 0.0113               | 0.9887               | 93,064               | 1,048                | 462,700              | 4,370,253            | 47.0                 | 2.5         |
| [25,30)    | 5               | 0.0015               | 0.0163               | 0.9837               | 92,016               | 1,502                | 456,326              | 3,907,553            | 42.5                 | 2.5         |
| [30,35)    | 5               | 0.0020               | 0.0180               | 0.9820               | 90,514               | 1,633                | 448,489              | 3,451,228            | 38.1                 | 2.5         |
| [35,40)    | 5               | 0.0025               | 0.0175               | 0.9825               | 88,881               | 1,553                | 440,526              | 3,002,738            | 33.8                 | 2.5         |
| [40,45)    | 5               | 0.0035               | 0.0291               | 0.9709               | 87,329               | 2,540                | 430,294              | 2,562,213            | 29.3                 | 2.5         |
| [45,50)    | 5               | 0.0055               | 0.0452               | 0.9548               | 84,789               | 3,828                | 414,373              | 2,131,918            | 25.1                 | 2.5         |
| [50,55)    | 5               | 0.0085               | 0.0698               | 0.9302               | 80,960               | 5,650                | 390,677              | 1,717,545            | 21.2                 | 2.5         |
| [55,60)    | 5               | 0.0130               | 0.0893               | 0.9107               | 75,310               | 6,722                | 359,746              | 1,326,868            | 17.6                 | 2.5         |
| [60,65)    | 5               | 0.0220               | 0.1660               | 0.8340               | 68,588               | 11,387               | 314,473              | 967,122              | 14.1                 | 2.5         |
| [65,70)    | 5               | 0.0345               | 0.2045               | 0.7955               | 57,201               | 11,699               | 256,757              | 652,649              | 11.4                 | 2.5         |
| [70,75)    | 5               | 0.0550               | 0.3234               | 0.6766               | 45,502               | 14,715               | 190,722              | 395,892              | 8.7                  | 2.5         |
| [75,+)     | 5               | 0.0895               | 1.0000               | 0.0000               | 30,787               | 30,787               | 205,171              | 205,171              | 6.7                  | 2.5         |

| <i>Age (years)</i> |     | <i>Cohort</i> | <i>Mortality</i> | <i>Survival</i> | <i>Life Exp.</i> |
|--------------------|-----|---------------|------------------|-----------------|------------------|
| 9                  | -   | 4,701,100     | 0.0002           | 1.0000          | 62.6141          |
| 9                  | 0.5 | 4,700,630     | 0.0002           | 0.9999          | 62.1262          |
| 10                 | 1   | 4,700,160     | 0.0002           | 0.9998          | 61.6383          |
| 11                 | 2   | 4,699,220     | 0.0002           | 0.9996          | 60.6619          |
| 12                 | 3   | 4,698,280     | 0.0002           | 0.9994          | 59.6852          |
| 13                 | 4   | 4,697,341     | 0.0002           | 0.9992          | 58.7081          |
| 14                 | 5   | 4,696,401     | 0.0002           | 0.9990          | 57.7307          |
| 15                 | 6   | 4,695,462     | 0.0002           | 0.9988          | 56.7528          |
| 16                 | 7   | 4,694,523     | 0.0002           | 0.9986          | 55.8060          |
| 17                 | 8   | 4,693,584     | 0.0002           | 0.9984          | 54.8584          |
| 18                 | 9   | 4,692,646     | 0.0002           | 0.9982          | 53.9098          |
| 19                 | 10  | 4,691,707     | 0.0002           | 0.9980          | 52.9603          |
