# Supplementary material for: Cost-effectiveness and budget impact analyses of dengue vaccination in Indonesia
Source: PubMed Central journal article supplement (PMC8384188; doi:10.1371/journal.pntd.0009664), 2021-08-12
Supplement: pntd.0009664.s002.pdf [file pntd.0009664.s002.pdf]

UNDISCOUNTED

No Vaccination

| age (year) | age (month) | DF                |                 |       |                     |                 |       | DHF               |                 |       |                     |                 |       | DSS               |                 |       |                     |                 |       | total   |
|------------|-------------|-------------------|-----------------|-------|---------------------|-----------------|-------|-------------------|-----------------|-------|---------------------|-----------------|-------|-------------------|-----------------|-------|---------------------|-----------------|-------|---------|
|            |             | primary infection |                 |       | secondary infection |                 |       | primary infection |                 |       | secondary infection |                 |       | primary infection |                 |       | secondary infection |                 |       |         |
|            |             | outpatient        | hospitalization | death | outpatient          | hospitalization | death | outpatient        | hospitalization | death | outpatient          | hospitalization | death | outpatient        | hospitalization | death | outpatient          | hospitalization | death |         |
| TOTAL      |             | 113,836           | 8,928           | 1,019 | 182,137             | 14,285          | 1,630 | 65,826            | 31,063          | 804   | 104,862             | 49,485          | 1,281 | 0                 | 265             | 2     | 0                   | 464             | 4     | 575,424 |
| 9          | -           | 10,359            | 812             | 93    | 16,574              | 1,300           | 148   | 5,980             | 2,827           | 73    | 9,542               | 4,503           | 117   | -                 | 24              | 0     | -                   | 42              | 0     | 52,364  |
| 10         | 1           | 10,357            | 812             | 93    | 16,571              | 1,300           | 148   | 5,989             | 2,826           | 73    | 9,541               | 4,502           | 117   | -                 | 24              | 0     | -                   | 42              | 0     | 52,353  |
| 11         | 2           | 10,355            | 812             | 93    | 16,568              | 1,299           | 148   | 5,988             | 2,826           | 73    | 9,539               | 4,501           | 117   | -                 | 24              | 0     | -                   | 42              | 0     | 52,343  |
| 12         | 3           | 10,353            | 812             | 93    | 16,565              | 1,299           | 148   | 5,987             | 2,825           | 73    | 9,537               | 4,500           | 117   | -                 | 24              | 0     | -                   | 42              | 0     | 52,332  |
| 13         | 4           | 10,351            | 812             | 93    | 16,561              | 1,299           | 148   | 5,985             | 2,825           | 73    | 9,535               | 4,499           | 116   | -                 | 24              | 0     | -                   | 42              | 0     | 52,322  |
| 14         | 5           | 10,349            | 812             | 93    | 16,558              | 1,299           | 148   | 5,984             | 2,824           | 73    | 9,533               | 4,499           | 116   | -                 | 24              | 0     | -                   | 42              | 0     | 52,311  |
| 15         | 6           | 10,347            | 812             | 93    | 16,555              | 1,298           | 148   | 5,983             | 2,823           | 73    | 9,531               | 4,498           | 116   | -                 | 24              | 0     | -                   | 42              | 0     | 52,301  |
| 16         | 7           | 10,345            | 811             | 93    | 16,551              | 1,298           | 148   | 5,982             | 2,823           | 73    | 9,529               | 4,497           | 116   | -                 | 24              | 0     | -                   | 42              | 0     | 52,290  |
| 17         | 8           | 10,342            | 811             | 93    | 16,548              | 1,298           | 148   | 5,981             | 2,822           | 73    | 9,527               | 4,496           | 116   | -                 | 24              | 0     | -                   | 42              | 0     | 52,280  |
| 18         | 9           | 10,340            | 811             | 93    | 16,545              | 1,298           | 148   | 5,979             | 2,822           | 73    | 9,525               | 4,495           | 116   | -                 | 24              | 0     | -                   | 42              | 0     | 52,269  |
| 19         | 10          | 10,338            | 811             | 93    | 16,541              | 1,297           | 148   | 5,978             | 2,821           | 73    | 9,523               | 4,494           | 116   | -                 | 24              | 0     | -                   | 42              | 0     | 52,259  |

Vaccination

| age (year) | age (month) | DF                |                 |       |                     |                 |       | DHF               |                 |       |                     |                 |       | DSS               |                 |       |                     |                 |       | total   |
|------------|-------------|-------------------|-----------------|-------|---------------------|-----------------|-------|-------------------|-----------------|-------|---------------------|-----------------|-------|-------------------|-----------------|-------|---------------------|-----------------|-------|---------|
|            |             | primary infection |                 |       | secondary infection |                 |       | primary infection |                 |       | secondary infection |                 |       | primary infection |                 |       | secondary infection |                 |       |         |
|            |             | outpatient        | hospitalization | death | outpatient          | hospitalization | death | outpatient        | hospitalization | death | outpatient          | hospitalization | death | outpatient        | hospitalization | death | outpatient          | hospitalization | death |         |
| TOTAL      |             | 78,651            | 6,169           | 704   | 125,841             | 9,870           | 1,126 | 45,480            | 21,462          | 556   | 72,451              | 34,190          | 885   | 0                 | 183             | 2     | 0                   | 321             | 3     | 397,569 |
| 9          | -           | 7,157             | 561             | 64    | 11,452              | 898             | 103   | 4,139             | 1,953           | 51    | 6,593               | 3,111           | 81    | 0                 | 17              | 0     | 0                   | 29              | 0     | 36,179  |
| 10         | 1           | 7,156             | 561             | 64    | 11,449              | 898             | 102   | 4,138             | 1,953           | 51    | 6,592               | 3,111           | 81    | 0                 | 17              | 0     | 0                   | 29              | 0     | 36,172  |
| 11         | 2           | 7,154             | 561             | 64    | 11,447              | 898             | 102   | 4,137             | 1,952           | 51    | 6,590               | 3,110           | 81    | 0                 | 17              | 0     | 0                   | 29              | 0     | 36,164  |
| 12         | 3           | 7,153             | 561             | 64    | 11,445              | 898             | 102   | 4,136             | 1,952           | 51    | 6,589               | 3,109           | 80    | 0                 | 17              | 0     | 0                   | 29              | 0     | 36,157  |
| 13         | 4           | 7,152             | 561             | 64    | 11,442              | 897             | 102   | 4,135             | 1,951           | 51    | 6,588               | 3,109           | 80    | 0                 | 17              | 0     | 0                   | 29              | 0     | 36,150  |
| 14         | 5           | 7,150             | 561             | 64    | 11,440              | 897             | 102   | 4,135             | 1,951           | 51    | 6,586               | 3,108           | 80    | 0                 | 17              | 0     | 0                   | 29              | 0     | 36,143  |
| 15         | 6           | 7,149             | 561             | 64    | 11,438              | 897             | 102   | 4,134             | 1,951           | 51    | 6,585               | 3,108           | 80    | 0                 | 17              | 0     | 0                   | 29              | 0     | 36,135  |
| 16         | 7           | 7,147             | 561             | 64    | 11,436              | 897             | 102   | 4,133             | 1,950           | 50    | 6,584               | 3,107           | 80    | 0                 | 17              | 0     | 0                   | 29              | 0     | 36,128  |
| 17         | 8           | 7,146             | 560             | 64    | 11,433              | 897             | 102   | 4,132             | 1,950           | 50    | 6,582               | 3,106           | 80    | 0                 | 17              | 0     | 0                   | 29              | 0     | 36,121  |
| 18         | 9           | 7,144             | 560             | 64    | 11,431              | 897             | 102   | 4,131             | 1,950           | 50    | 6,581               | 3,106           | 80    | 0                 | 17              | 0     | 0                   | 29              | 0     | 36,114  |
| 19         | 10          | 7,143             | 560             | 64    | 11,429              | 896             | 102   | 4,130             | 1,949           | 50    | 6,580               | 3,105           | 80    | 0                 | 17              | 0     | 0                   | 29              | 0     | 36,107  |

DISCOUNTED

No Vaccination

| age (year) | age (month) | DF                |                 |       |                     |                 |       | DHF               |                 |       |                     |                 |       | DSS               |                 |       |                     |                 |       | total   |
|------------|-------------|-------------------|-----------------|-------|---------------------|-----------------|-------|-------------------|-----------------|-------|---------------------|-----------------|-------|-------------------|-----------------|-------|---------------------|-----------------|-------|---------|
|            |             | primary infection |                 |       | secondary infection |                 |       | primary infection |                 |       | secondary infection |                 |       | primary infection |                 |       | secondary infection |                 |       |         |
|            |             | outpatient        | hospitalization | death | outpatient          | hospitalization | death | outpatient        | hospitalization | death | outpatient          | hospitalization | death | outpatient        | hospitalization | death | outpatient          | hospitalization | death |         |
| TOTAL      |             | 75,592            | 5,929           | 677   | 120,948             | 9,486           | 1,083 | 43,711            | 20,628          | 534   | 69,633              | 32,860          | 851   | 0                 | 176             | 1     | 0                   | 308             | 3     | 382,109 |
| 9          | -           | 7,939             | 623             | 71    | 12,703              | 996             | 114   | 4,591             | 2,166           | 56    | 7,313               | 3,451           | 89    | 0                 | 18              | 0     | 0                   | 32              | 0     | 40,132  |
| 10         | 1           | 7,707             | 604             | 69    | 12,331              | 967             | 110   | 4,456             | 2,103           | 54    | 7,099               | 3,350           | 87    | 0                 | 18              | 0     | 0                   | 31              | 0     | 38,956  |
| 11         | 2           | 7,481             | 587             | 67    | 11,969              | 939             | 107   | 4,326             | 2,041           | 53    | 6,891               | 3,252           | 84    | 0                 | 17              | 0     | 0                   | 30              | 0     | 37,813  |
| 12         | 3           | 7,261             | 570             | 65    | 11,618              | 911             | 104   | 4,199             | 1,981           | 51    | 6,689               | 3,156           | 82    | 0                 | 17              | 0     | 0                   | 30              | 0     | 36,705  |
| 13         | 4           | 7,048             | 553             | 63    | 11,277              | 885             | 101   | 4,076             | 1,923           | 50    | 6,493               | 3,064           | 79    | 0                 | 16              | 0     | 0                   | 29              | 0     | 35,629  |
| 14         | 5           | 6,842             | 537             | 61    | 10,947              | 859             | 98    | 3,956             | 1,867           | 48    | 6,302               | 2,974           | 77    | 0                 | 16              | 0     | 0                   | 28              | 0     | 34,584  |
| 15         | 6           | 6,641             | 521             | 59    | 10,626              | 833             | 95    | 3,840             | 1,812           | 47    | 6,118               | 2,887           | 75    | 0                 | 15              | 0     | 0                   | 27              | 0     | 33,570  |
| 16         | 7           | 6,446             | 506             | 58    | 10,314              | 809             | 92    | 3,728             | 1,759           | 46    | 5,938               | 2,802           | 73    | 0                 | 15              | 0     | 0                   | 26              | 0     | 32,586  |
| 17         | 8           | 6,257             | 491             | 56    | 10,012              | 785             | 90    | 3,618             | 1,708           | 44    | 5,764               | 2,720           | 70    | 0                 | 15              | 0     | 0                   | 26              | 0     | 31,630  |
| 18         | 9           | 6,074             | 476             | 54    | 9,718               | 762             | 87    | 3,512             | 1,657           | 43    | 5,595               | 2,640           | 68    | 0                 | 14              | 0     | 0                   | 25              | 0     | 30,703  |
| 19         | 10          | 5,896             | 462             | 53    | 9,433               | 740             | 84    | 3,409             | 1,609           | 42    | 5,431               | 2,563           | 66    | 0                 | 14              | 0     | 0                   | 24              | 0     | 29,803  |

Vaccination

| age (year) | age (month) | DF                |                 |       |                     |                 |       | DHF               |                 |       |                     |                 |       | DSS               |                 |       |                     |                 |       | total   |
|------------|-------------|-------------------|-----------------|-------|---------------------|-----------------|-------|-------------------|-----------------|-------|---------------------|-----------------|-------|-------------------|-----------------|-------|---------------------|-----------------|-------|---------|
|            |             | primary infection |                 |       | secondary infection |                 |       | primary infection |                 |       | secondary infection |                 |       | primary infection |                 |       | secondary infection |                 |       |         |
|            |             | outpatient        | hospitalization | death | outpatient          | hospitalization | death | outpatient        | hospitalization | death | outpatient          | hospitalization | death | outpatient        | hospitalization | death | outpatient          | hospitalization | death |         |
| TOTAL      |             | 52,228            | 4,096           | 467   | 83,565              | 6,554           | 748   | 30,201            | 14,252          | 369   | 48,111              | 22,704          | 588   | 0                 | 122             | 1     | 0                   | 213             | 2     | 264,005 |
| 9          | -           | 5,485             | 430             | 49    | 8,777               | 688             | 79    | 3,172             | 1,497           | 39    | 5,053               | 2,385           | 62    | 0                 | 13              | 0     | 0                   | 22              | 0     | 27,728  |
| 10         | 1           | 5,325             | 418             | 48    | 8,519               | 668             | 76    | 3,079             | 1,453           | 38    | 4,905               | 2,315           | 60    | 0                 | 12              | 0     | 0                   | 22              | 0     | 26,915  |
| 11         | 2           | 5,168             | 405             | 46    | 8,270               | 649             | 74    | 2,989             | 1,410           | 37    | 4,761               | 2,247           | 58    | 0                 | 12              | 0     | 0                   | 21              | 0     | 26,126  |
| 12         | 3           | 5,017             | 393             | 45    | 8,027               | 630             | 72    | 2,901             | 1,369           | 35    | 4,621               | 2,181           | 56    | 0                 | 12              | 0     | 0                   | 20              | 0     | 25,360  |
| 13         | 4           | 4,870             | 382             | 44    | 7,792               | 611             | 70    | 2,816             | 1,329           | 34    | 4,486               | 2,117           | 55    | 0                 | 11              | 0     | 0                   | 20              | 0     | 24,616  |
| 14         | 5           | 4,727             | 371             | 42    | 7,563               | 593             | 68    | 2,733             | 1,290           | 33    | 4,354               | 2,055           | 53    | 0                 | 11              | 0     | 0                   | 19              | 0     | 23,895  |
| 15         | 6           | 4,588             | 360             | 41    | 7,342               | 576             | 66    | 2,653             | 1,252           | 32    | 4,227               | 1,995           | 52    | 0                 | 11              | 0     | 0                   | 19              | 0     | 23,194  |
| 16         | 7           | 4,454             | 349             | 40    | 7,126               | 559             | 64    | 2,575             | 1,215           | 31    | 4,103               | 1,936           | 50    | 0                 | 10              | 0     | 0                   | 18              | 0     | 22,514  |
| 17         | 8           | 4,323             | 339             | 39    | 6,917               | 543             | 62    | 2,500             | 1,180           | 31    | 3,983               | 1,879           | 49    | 0                 | 10              | 0     | 0                   | 18              | 0     | 21,854  |
| 18         | 9           | 4,197             | 329             | 38    | 6,714               | 527             | 60    | 2,427             | 1,145           | 30    | 3,866               | 1,824           | 47    | 0                 | 10              | 0     | 0                   | 17              | 0     | 21,213  |
| 19         | 10          | 4,074             | 319             | 36    | 6,518               | 511             | 58    | 2,356             | 1,112           | 29    | 3,752               | 1,771           | 46    | 0                 | 9               | 0     | 0                   | 17              | 0     | 20,591  |
