# Supplementary material for: Cost-effectiveness and budget impact analyses of dengue vaccination in Indonesia
Source: PubMed Central journal article supplement (PMC8384188; doi:10.1371/journal.pntd.0009664), 2021-08-12
Supplement: pntd.0009664.s003.pdf [file pntd.0009664.s003.pdf]

UNDISCOUNTED

No Vaccination

| age (year)   | age (month) | DF                 |                    |            |                     |                    |            | DHF                |                    |            |                     |                     |            | DSS               |                 |            |                     |                  |            | total               |
|--------------|-------------|--------------------|--------------------|------------|---------------------|--------------------|------------|--------------------|--------------------|------------|---------------------|---------------------|------------|-------------------|-----------------|------------|---------------------|------------------|------------|---------------------|
|              |             | primary infection  |                    |            | secondary infection |                    |            | primary infection  |                    |            | secondary infection |                     |            | primary infection |                 |            | secondary infection |                  |            |                     |
|              |             | outpatient         | hospitalization    | death      | outpatient          | hospitalization    | death      | outpatient         | hospitalization    | death      | outpatient          | hospitalization     | death      | outpatient        | hospitalization | death      | outpatient          | hospitalization  | death      |                     |
| <b>TOTAL</b> |             | <b>\$2,188,049</b> | <b>\$2,658,726</b> | <b>\$0</b> | <b>\$3,500,879</b>  | <b>\$4,253,962</b> | <b>\$0</b> | <b>\$1,265,242</b> | <b>\$9,250,243</b> | <b>\$0</b> | <b>\$2,015,560</b>  | <b>\$14,735,853</b> | <b>\$0</b> | <b>\$0</b>        | <b>\$78,948</b> | <b>\$0</b> | <b>\$0</b>          | <b>\$138,159</b> | <b>\$0</b> | <b>\$40,085,623</b> |
| 9            | -           | \$199,113          | \$241,944          | \$0        | \$318,580           | \$387,111          | \$0        | \$115,137          | \$841,772          | \$0        | \$183,416           | \$1,340,963         | \$0        | \$0               | \$7,184         | \$0        | \$0                 | \$12,572         | \$0        | \$3,647,793         |
| 10           | 1           | \$199,073          | \$241,896          | \$0        | \$318,516           | \$387,033          | \$0        | \$115,114          | \$841,604          | \$0        | \$183,379           | \$1,340,895         | \$0        | \$0               | \$7,183         | \$0        | \$0                 | \$12,570         | \$0        | \$3,647,063         |
| 11           | 2           | \$199,033          | \$241,847          | \$0        | \$318,453           | \$386,956          | \$0        | \$115,091          | \$841,436          | \$0        | \$183,343           | \$1,340,827         | \$0        | \$0               | \$7,181         | \$0        | \$0                 | \$12,567         | \$0        | \$3,646,334         |
| 12           | 3           | \$198,993          | \$241,799          | \$0        | \$318,389           | \$386,878          | \$0        | \$115,068          | \$841,267          | \$0        | \$183,306           | \$1,340,759         | \$0        | \$0               | \$7,180         | \$0        | \$0                 | \$12,565         | \$0        | \$3,645,605         |
| 13           | 4           | \$198,953          | \$241,751          | \$0        | \$318,325           | \$386,801          | \$0        | \$115,045          | \$841,099          | \$0        | \$183,269           | \$1,339,691         | \$0        | \$0               | \$7,179         | \$0        | \$0                 | \$12,562         | \$0        | \$3,644,876         |
| 14           | 5           | \$198,914          | \$241,702          | \$0        | \$318,262           | \$386,724          | \$0        | \$115,022          | \$840,931          | \$0        | \$183,233           | \$1,339,623         | \$0        | \$0               | \$7,177         | \$0        | \$0                 | \$12,560         | \$0        | \$3,644,147         |
| 15           | 6           | \$198,874          | \$241,654          | \$0        | \$318,198           | \$386,646          | \$0        | \$114,999          | \$840,763          | \$0        | \$183,196           | \$1,339,555         | \$0        | \$0               | \$7,176         | \$0        | \$0                 | \$12,557         | \$0        | \$3,643,418         |
| 16           | 7           | \$198,834          | \$241,606          | \$0        | \$318,134           | \$386,569          | \$0        | \$114,976          | \$840,595          | \$0        | \$183,159           | \$1,339,487         | \$0        | \$0               | \$7,174         | \$0        | \$0                 | \$12,555         | \$0        | \$3,642,689         |
| 17           | 8           | \$198,794          | \$241,557          | \$0        | \$318,071           | \$386,492          | \$0        | \$114,953          | \$840,427          | \$0        | \$183,123           | \$1,338,419         | \$0        | \$0               | \$7,173         | \$0        | \$0                 | \$12,552         | \$0        | \$3,641,961         |
| 18           | 9           | \$198,754          | \$241,509          | \$0        | \$318,007           | \$386,415          | \$0        | \$114,930          | \$840,259          | \$0        | \$183,086           | \$1,338,351         | \$0        | \$0               | \$7,171         | \$0        | \$0                 | \$12,550         | \$0        | \$3,641,233         |
| 19           | 10          | \$198,715          | \$241,461          | \$0        | \$317,944           | \$386,337          | \$0        | \$114,907          | \$840,091          | \$0        | \$183,050           | \$1,338,284         | \$0        | \$0               | \$7,170         | \$0        | \$0                 | \$12,547         | \$0        | \$3,640,504         |

Vaccination

| age (year)   | age (month) | DF                 |                    |            |                     |                    |            | DHF               |                    |            |                     |                     |            | DSS               |                 |            |                     |                 |            | total               |
|--------------|-------------|--------------------|--------------------|------------|---------------------|--------------------|------------|-------------------|--------------------|------------|---------------------|---------------------|------------|-------------------|-----------------|------------|---------------------|-----------------|------------|---------------------|
|              |             | primary infection  |                    |            | secondary infection |                    |            | primary infection |                    |            | secondary infection |                     |            | primary infection |                 |            | secondary infection |                 |            |                     |
|              |             | outpatient         | hospitalization    | death      | outpatient          | hospitalization    | death      | outpatient        | hospitalization    | death      | outpatient          | hospitalization     | death      | outpatient        | hospitalization | death      | outpatient          | hospitalization | death      |                     |
| <b>TOTAL</b> |             | <b>\$1,511,758</b> | <b>\$1,836,956</b> | <b>\$0</b> | <b>\$2,418,812</b>  | <b>\$2,939,130</b> | <b>\$0</b> | <b>\$874,176</b>  | <b>\$6,391,139</b> | <b>\$0</b> | <b>\$1,392,583</b>  | <b>\$10,181,233</b> | <b>\$0</b> | <b>\$0</b>        | <b>\$54,546</b> | <b>\$0</b> | <b>\$0</b>          | <b>\$95,456</b> | <b>\$0</b> | <b>\$27,695,790</b> |
| 9            | -           | \$137,570          | \$167,163          | \$0        | \$220,112           | \$267,461          | \$0        | \$79,550          | \$581,594          | \$0        | \$126,725           | \$926,493           | \$0        | \$0               | \$4,964         | \$0        | \$0                 | \$8,687         | \$0        | \$2,520,318         |
| 10           | 1           | \$137,542          | \$167,130          | \$0        | \$220,068           | \$267,407          | \$0        | \$79,534          | \$581,478          | \$0        | \$126,700           | \$926,307           | \$0        | \$0               | \$4,963         | \$0        | \$0                 | \$8,685         | \$0        | \$2,519,814         |
| 11           | 2           | \$137,515          | \$167,096          | \$0        | \$220,024           | \$267,354          | \$0        | \$79,518          | \$581,361          | \$0        | \$126,674           | \$926,122           | \$0        | \$0               | \$4,962         | \$0        | \$0                 | \$8,683         | \$0        | \$2,519,310         |
| 12           | 3           | \$137,487          | \$167,063          | \$0        | \$219,980           | \$267,300          | \$0        | \$79,502          | \$581,245          | \$0        | \$126,649           | \$925,937           | \$0        | \$0               | \$4,961         | \$0        | \$0                 | \$8,681         | \$0        | \$2,518,806         |
| 13           | 4           | \$137,460          | \$167,029          | \$0        | \$219,936           | \$267,247          | \$0        | \$79,486          | \$581,129          | \$0        | \$126,624           | \$925,752           | \$0        | \$0               | \$4,960         | \$0        | \$0                 | \$8,680         | \$0        | \$2,518,302         |
| 14           | 5           | \$137,432          | \$166,996          | \$0        | \$219,892           | \$267,194          | \$0        | \$79,471          | \$581,013          | \$0        | \$126,598           | \$925,566           | \$0        | \$0               | \$4,959         | \$0        | \$0                 | \$8,678         | \$0        | \$2,517,799         |
| 15           | 6           | \$137,405          | \$166,963          | \$0        | \$219,848           | \$267,140          | \$0        | \$79,455          | \$580,896          | \$0        | \$126,573           | \$925,381           | \$0        | \$0               | \$4,958         | \$0        | \$0                 | \$8,676         | \$0        | \$2,517,295         |
| 16           | 7           | \$137,378          | \$166,929          | \$0        | \$219,804           | \$267,087          | \$0        | \$79,439          | \$580,780          | \$0        | \$126,548           | \$925,196           | \$0        | \$0               | \$4,957         | \$0        | \$0                 | \$8,674         | \$0        | \$2,516,792         |
| 17           | 8           | \$137,350          | \$166,896          | \$0        | \$219,760           | \$267,033          | \$0        | \$79,423          | \$580,664          | \$0        | \$126,522           | \$925,011           | \$0        | \$0               | \$4,956         | \$0        | \$0                 | \$8,673         | \$0        | \$2,516,288         |
| 18           | 9           | \$137,323          | \$166,862          | \$0        | \$219,716           | \$266,980          | \$0        | \$79,407          | \$580,548          | \$0        | \$126,497           | \$924,826           | \$0        | \$0               | \$4,955         | \$0        | \$0                 | \$8,671         | \$0        | \$2,515,785         |
| 19           | 10          | \$137,295          | \$166,829          | \$0        | \$219,672           | \$266,926          | \$0        | \$79,391          | \$580,432          | \$0        | \$126,472           | \$924,641           | \$0        | \$0               | \$4,954         | \$0        | \$0                 | \$8,669         | \$0        | \$2,515,282         |

DISCOUNTED

No Vaccination

| age (year)   | age (month) | DF                 |                    |            |                     |                    |            | DHF               |                    |            |                     |                    |            | DSS               |                 |            |                     |                 |            | total               |
|--------------|-------------|--------------------|--------------------|------------|---------------------|--------------------|------------|-------------------|--------------------|------------|---------------------|--------------------|------------|-------------------|-----------------|------------|---------------------|-----------------|------------|---------------------|
|              |             | primary infection  |                    |            | secondary infection |                    |            | primary infection |                    |            | secondary infection |                    |            | primary infection |                 |            | secondary infection |                 |            |                     |
|              |             | outpatient         | hospitalization    | death      | outpatient          | hospitalization    | death      | outpatient        | hospitalization    | death      | outpatient          | hospitalization    | death      | outpatient        | hospitalization | death      | outpatient          | hospitalization | death      |                     |
| <b>TOTAL</b> |             | <b>\$1,452,972</b> | <b>\$1,765,524</b> | <b>\$0</b> | <b>\$2,324,755</b>  | <b>\$2,824,839</b> | <b>\$0</b> | <b>\$840,183</b>  | <b>\$6,142,614</b> | <b>\$0</b> | <b>\$1,338,431</b>  | <b>\$9,785,327</b> | <b>\$0</b> | <b>\$0</b>        | <b>\$52,425</b> | <b>\$0</b> | <b>\$0</b>          | <b>\$91,744</b> | <b>\$0</b> | <b>\$26,618,814</b> |
| 9            | -           | \$152,603          | \$185,430          | \$0        | \$244,165           | \$296,688          | \$0        | \$88,243          | \$645,148          | \$0        | \$140,573           | \$1,027,736        | \$0        | \$0               | \$5,506         | \$0        | \$0                 | \$9,636         | \$0        | \$2,795,729         |
| 10           | 1           | \$148,129          | \$179,993          | \$0        | \$237,006           | \$287,989          | \$0        | \$85,656          | \$626,232          | \$0        | \$136,451           | \$997,603          | \$0        | \$0               | \$5,345         | \$0        | \$0                 | \$9,353         | \$0        | \$2,713,758         |
| 11           | 2           | \$143,786          | \$174,716          | \$0        | \$230,057           | \$279,545          | \$0        | \$83,144          | \$607,871          | \$0        | \$132,451           | \$968,353          | \$0        | \$0               | \$5,188         | \$0        | \$0                 | \$9,079         | \$0        | \$2,634,189         |
| 12           | 3           | \$139,570          | \$169,593          | \$0        | \$223,312           | \$271,349          | \$0        | \$80,706          | \$590,048          | \$0        | \$128,567           | \$939,960          | \$0        | \$0               | \$5,036         | \$0        | \$0                 | \$8,813         | \$0        | \$2,556,954         |
| 13           | 4           | \$135,478          | \$164,620          | \$0        | \$216,764           | \$263,393          | \$0        | \$78,340          | \$572,748          | \$0        | \$124,798           | \$912,400          | \$0        | \$0               | \$4,888         | \$0        | \$0                 | \$8,554         | \$0        | \$2,481,983         |
| 14           | 5           | \$131,505          | \$159,794          | \$0        | \$210,408           | \$255,670          | \$0        | \$76,043          | \$555,954          | \$0        | \$121,138           | \$885,648          | \$0        | \$0               | \$4,745         | \$0        | \$0                 | \$8,304         | \$0        | \$2,409,210         |
| 15           | 6           | \$127,649          | \$155,109          | \$0        | \$204,239           | \$248,174          | \$0        | \$73,813          | \$539,654          | \$0        | \$117,587           | \$869,681          | \$0        | \$0               | \$4,606         | \$0        | \$0                 | \$8,060         | \$0        | \$2,338,571         |
| 16           | 7           | \$123,907          | \$150,561          | \$0        | \$198,251           | \$240,897          | \$0        | \$71,649          | \$523,831          | \$0        | \$114,139           | \$834,475          | \$0        | \$0               | \$4,471         | \$0        | \$0                 | \$7,824         | \$0        | \$2,270,004         |
| 17           | 8           | \$120,274          | \$146,146          | \$0        | \$192,438           | \$233,834          | \$0        | \$69,548          | \$508,472          | \$0        | \$110,792           | \$810,008          | \$0        | \$0               | \$4,340         | \$0        | \$0                 | \$7,594         | \$0        | \$2,203,446         |
| 18           | 9           | \$116,747          | \$141,861          | \$0        | \$186,796           | \$226,978          | \$0        | \$67,509          | \$493,563          | \$0        | \$107,544           | \$786,258          | \$0        | \$0               | \$4,212         | \$0        | \$0                 | \$7,372         | \$0        | \$2,138,840         |
| 19           | 10          | \$113,324          | \$137,702          | \$0        | \$181,319           | \$220,323          | \$0        | \$65,530          | \$479,092          | \$0        | \$104,391           | \$763,205          | \$0        | \$0               | \$4,089         | \$0        | \$0                 | \$7,156         | \$0        | \$2,076,129         |

Vaccination

| age (year)   | age (month) | DF                 |                    |            |                     |                    |            | DHF               |                    |            |                     |                    |            | DSS               |                 |            |                     |                 |            | total               |
|--------------|-------------|--------------------|--------------------|------------|---------------------|--------------------|------------|-------------------|--------------------|------------|---------------------|--------------------|------------|-------------------|-----------------|------------|---------------------|-----------------|------------|---------------------|
|              |             | primary infection  |                    |            | secondary infection |                    |            | primary infection |                    |            | secondary infection |                    |            | primary infection |                 |            | secondary infection |                 |            |                     |
|              |             | outpatient         | hospitalization    | death      | outpatient          | hospitalization    | death      | outpatient        | hospitalization    | death      | outpatient          | hospitalization    | death      | outpatient        | hospitalization | death      | outpatient          | hospitalization | death      |                     |
| <b>TOTAL</b> |             | <b>\$1,003,881</b> | <b>\$1,219,829</b> | <b>\$0</b> | <b>\$1,606,210</b>  | <b>\$1,951,726</b> | <b>\$0</b> | <b>\$580,496</b>  | <b>\$4,244,029</b> | <b>\$0</b> | <b>\$924,743</b>    | <b>\$6,760,837</b> | <b>\$0</b> | <b>\$0</b>        | <b>\$36,221</b> | <b>\$0</b> | <b>\$0</b>          | <b>\$63,388</b> | <b>\$0</b> | <b>\$18,391,359</b> |
| 9            | -           | \$105,436          | \$128,117          | \$0        | \$168,698           | \$204,986          | \$0        | \$60,968          | \$445,743          | \$0        | \$97,124            | \$710,079          | \$0        | \$0               | \$3,804         | \$0        | \$0                 | \$6,657         | \$0        | \$1,931,614         |
| 10           | 1           | \$102,345          | \$124,360          | \$0        | \$163,751           | \$198,976          | \$0        | \$59,181          | \$432,674          | \$0        | \$94,276            | \$689,260          | \$0        | \$0               | \$3,693         | \$0        | \$0                 | \$6,462         | \$0        | \$1,874,978         |
| 11           | 2           | \$99,344           | \$120,714          | \$0        | \$158,950           | \$193,142          | \$0        | \$57,446          | \$419,988          | \$0        | \$91,512            | \$669,050          | \$0        | \$0               | \$3,584         | \$0        | \$0                 | \$6,273         | \$0        | \$1,820,003         |
| 12           | 3           | \$96,431           | \$117,174          | \$0        | \$154,290           | \$187,479          | \$0        | \$55,761          | \$407,674          | \$0        | \$88,829            | \$649,433          | \$0        | \$0               | \$3,479         | \$0        | \$0                 | \$6,089         | \$0        | \$1,766,640         |
| 13           | 4           | \$93,604           | \$113,739          | \$0        | \$149,766           | \$181,982          | \$0        | \$54,126          | \$395,720          | \$0        | \$86,225            | \$630,392          | \$0        | \$0               | \$3,377         | \$0        | \$0                 | \$5,910         | \$0        | \$1,714,841         |
| 14           | 5           | \$90,859           | \$110,404          | \$0        | \$145,375           | \$176,646          | \$0        | \$52,539          | \$384,118          | \$0        | \$83,696            | \$611,908          | \$0        | \$0               | \$3,278         | \$0        | \$0                 | \$5,737         | \$0        | \$1,664,561         |
| 15           | 6           | \$88,195           | \$107,167          | \$0        | \$141,112           | \$171,467          | \$0        | \$50,999          | \$372,855          | \$0        | \$81,242            | \$593,967          | \$0        | \$0               | \$3,182         | \$0        | \$0                 | \$5,569         | \$0        | \$1,615,756         |
| 16           | 7           | \$85,609           | \$104,025          | \$0        | \$136,975           | \$166,440          | \$0        | \$49,504          | \$361,923          | \$0        | \$78,860            | \$576,552          | \$0        | \$0               | \$3,089         | \$0        | \$0                 | \$5,406         | \$0        | \$1,568,381         |
| 17           | 8           | \$83,099           | \$100,975          | \$0        | \$132,958           | \$161,560          | \$0        | \$48,052          | \$351,311          | \$0        | \$76,548            | \$559,647          | \$0        | \$0               | \$2,998         | \$0        | \$0                 | \$5,247         | \$0        | \$1,522,396         |
| 18           | 9           | \$80,663           | \$98,014           | \$0        | \$129,060           | \$156,823          | \$0        | \$46,643          | \$341,011          | \$0        | \$74,304            | \$543,238          | \$0        | \$0               | \$2,910         | \$0        | \$0                 | \$5,093         | \$0        | \$1,477,759         |
| 19           | 10          | \$78,297           | \$95,140           | \$0        | \$125,276           | \$152,224          | \$0        | \$45,276          | \$331,012          | \$0        | \$72,1              |                    |            |                   |                 |            |                     |                 |            |                     |
