# Supplementary material for: Cost-effectiveness and budget impact analyses of dengue vaccination in Indonesia
Source: PubMed Central journal article supplement (PMC8384188; doi:10.1371/journal.pntd.0009664), 2021-08-12
Supplement: pntd.0009664.s004.pdf [file pntd.0009664.s004.pdf]

**UNDISCOUNTED**

**No Vaccination**

| age (year)   | age (month) | DF                |                 |       |                     |                 |       | DHF               |                 |       |                     |                 |       | DSS               |                 |       |                     |                 |       | total        |
|--------------|-------------|-------------------|-----------------|-------|---------------------|-----------------|-------|-------------------|-----------------|-------|---------------------|-----------------|-------|-------------------|-----------------|-------|---------------------|-----------------|-------|--------------|
|              |             | primary infection |                 |       | secondary infection |                 |       | primary infection |                 |       | secondary infection |                 |       | primary infection |                 |       | secondary infection |                 |       |              |
|              |             | outpatient        | hospitalization | death | outpatient          | hospitalization | death | outpatient        | hospitalization | death | outpatient          | hospitalization | death | outpatient        | hospitalization | death | outpatient          | hospitalization | death |              |
| <b>TOTAL</b> |             | \$70,053          | \$2,035,147     | \$0   | \$112,084           | \$3,256,236     | \$0   | \$40,508          | \$7,080,686     | \$0   | \$64,530            | \$11,279,698    | \$0   | \$0               | \$60,432        | \$0   | \$0                 | \$105,755       | \$0   | \$24,105,129 |
| 9            | -           | \$6,375           | \$185,198       | \$0   | \$10,200            | \$296,318       | \$0   | \$3,686           | \$644,243       | \$0   | \$5,872             | \$1,026,453     | \$0   | \$0               | \$5,499         | \$0   | \$0                 | \$9,624         | \$0   | \$2,193,567  |
| 10           | 1           | \$6,374           | \$185,161       | \$0   | \$10,198            | \$296,258       | \$0   | \$3,686           | \$644,214       | \$0   | \$5,871             | \$1,026,248     | \$0   | \$0               | \$5,498         | \$0   | \$0                 | \$9,622         | \$0   | \$2,193,129  |
| 11           | 2           | \$6,372           | \$185,124       | \$0   | \$10,196            | \$296,199       | \$0   | \$3,685           | \$644,085       | \$0   | \$5,870             | \$1,026,042     | \$0   | \$0               | \$5,497         | \$0   | \$0                 | \$9,620         | \$0   | \$2,192,690  |
| 12           | 3           | \$6,371           | \$185,087       | \$0   | \$10,194            | \$296,140       | \$0   | \$3,684           | \$643,956       | \$0   | \$5,869             | \$1,025,837     | \$0   | \$0               | \$5,496         | \$0   | \$0                 | \$9,618         | \$0   | \$2,192,252  |
| 13           | 4           | \$6,370           | \$185,050       | \$0   | \$10,192            | \$296,081       | \$0   | \$3,683           | \$643,827       | \$0   | \$5,868             | \$1,025,632     | \$0   | \$0               | \$5,495         | \$0   | \$0                 | \$9,616         | \$0   | \$2,191,813  |
| 14           | 5           | \$6,368           | \$185,013       | \$0   | \$10,189            | \$296,021       | \$0   | \$3,683           | \$643,699       | \$0   | \$5,866             | \$1,025,427     | \$0   | \$0               | \$5,494         | \$0   | \$0                 | \$9,614         | \$0   | \$2,191,375  |
| 15           | 6           | \$6,367           | \$184,976       | \$0   | \$10,187            | \$295,962       | \$0   | \$3,682           | \$643,570       | \$0   | \$5,865             | \$1,025,222     | \$0   | \$0               | \$5,493         | \$0   | \$0                 | \$9,612         | \$0   | \$2,190,937  |
| 16           | 7           | \$6,366           | \$184,939       | \$0   | \$10,185            | \$295,903       | \$0   | \$3,681           | \$643,441       | \$0   | \$5,864             | \$1,025,017     | \$0   | \$0               | \$5,492         | \$0   | \$0                 | \$9,610         | \$0   | \$2,190,499  |
| 17           | 8           | \$6,365           | \$184,902       | \$0   | \$10,183            | \$295,844       | \$0   | \$3,680           | \$643,313       | \$0   | \$5,863             | \$1,024,812     | \$0   | \$0               | \$5,490         | \$0   | \$0                 | \$9,608         | \$0   | \$2,190,060  |
| 18           | 9           | \$6,363           | \$184,865       | \$0   | \$10,181            | \$295,785       | \$0   | \$3,680           | \$643,184       | \$0   | \$5,862             | \$1,024,607     | \$0   | \$0               | \$5,489         | \$0   | \$0                 | \$9,606         | \$0   | \$2,189,623  |
| 19           | 10          | \$6,362           | \$184,828       | \$0   | \$10,179            | \$295,725       | \$0   | \$3,679           | \$643,055       | \$0   | \$5,861             | \$1,024,402     | \$0   | \$0               | \$5,488         | \$0   | \$0                 | \$9,604         | \$0   | \$2,189,185  |

**Vaccination**

| age (year)   | age (month) | DF                |                 |       |                     |                 |       | DHF               |                 |       |                     |                 |       | DSS               |                 |       |                     |                 |       | total        |
|--------------|-------------|-------------------|-----------------|-------|---------------------|-----------------|-------|-------------------|-----------------|-------|---------------------|-----------------|-------|-------------------|-----------------|-------|---------------------|-----------------|-------|--------------|
|              |             | primary infection |                 |       | secondary infection |                 |       | primary infection |                 |       | secondary infection |                 |       | primary infection |                 |       | secondary infection |                 |       |              |
|              |             | outpatient        | hospitalization | death | outpatient          | hospitalization | death | outpatient        | hospitalization | death | outpatient          | hospitalization | death | outpatient        | hospitalization | death | outpatient          | hospitalization | death |              |
| <b>TOTAL</b> |             | \$48,401          | \$1,406,115     | \$0   | \$77,441            | \$2,249,785     | \$0   | \$27,988          | \$4,892,158     | \$0   | \$44,585            | \$7,793,321     | \$0   | \$0               | \$41,753        | \$0   | \$0                 | \$73,068        | \$0   | \$16,654,614 |
| 9            | -           | \$4,404           | \$127,957       | \$0   | \$7,047             | \$204,730       | \$0   | \$2,547           | \$445,186       | \$0   | \$4,057             | \$709,192       | \$0   | \$0               | \$3,800         | \$0   | \$0                 | \$6,649         | \$0   | \$1,515,570  |
| 10           | 1           | \$4,404           | \$127,931       | \$0   | \$7,046             | \$204,690       | \$0   | \$2,546           | \$445,097       | \$0   | \$4,056             | \$709,051       | \$0   | \$0               | \$3,799         | \$0   | \$0                 | \$6,648         | \$0   | \$1,515,267  |
| 11           | 2           | \$4,403           | \$127,905       | \$0   | \$7,044             | \$204,649       | \$0   | \$2,546           | \$445,008       | \$0   | \$4,056             | \$709,909       | \$0   | \$0               | \$3,798         | \$0   | \$0                 | \$6,647         | \$0   | \$1,514,964  |
| 12           | 3           | \$4,402           | \$127,880       | \$0   | \$7,043             | \$204,608       | \$0   | \$2,545           | \$444,919       | \$0   | \$4,055             | \$708,767       | \$0   | \$0               | \$3,797         | \$0   | \$0                 | \$6,645         | \$0   | \$1,514,661  |
| 13           | 4           | \$4,401           | \$127,854       | \$0   | \$7,041             | \$204,567       | \$0   | \$2,545           | \$444,830       | \$0   | \$4,054             | \$708,625       | \$0   | \$0               | \$3,796         | \$0   | \$0                 | \$6,644         | \$0   | \$1,514,358  |
| 14           | 5           | \$4,400           | \$127,829       | \$0   | \$7,040             | \$204,526       | \$0   | \$2,544           | \$444,742       | \$0   | \$4,053             | \$708,484       | \$0   | \$0               | \$3,796         | \$0   | \$0                 | \$6,643         | \$0   | \$1,514,056  |
| 15           | 6           | \$4,399           | \$127,803       | \$0   | \$7,039             | \$204,485       | \$0   | \$2,544           | \$444,653       | \$0   | \$4,052             | \$708,342       | \$0   | \$0               | \$3,795         | \$0   | \$0                 | \$6,641         | \$0   | \$1,513,753  |
| 16           | 7           | \$4,398           | \$127,778       | \$0   | \$7,037             | \$204,444       | \$0   | \$2,543           | \$444,564       | \$0   | \$4,052             | \$708,200       | \$0   | \$0               | \$3,794         | \$0   | \$0                 | \$6,640         | \$0   | \$1,513,450  |
| 17           | 8           | \$4,397           | \$127,752       | \$0   | \$7,036             | \$204,403       | \$0   | \$2,543           | \$444,475       | \$0   | \$4,051             | \$708,059       | \$0   | \$0               | \$3,793         | \$0   | \$0                 | \$6,639         | \$0   | \$1,513,147  |
| 18           | 9           | \$4,397           | \$127,726       | \$0   | \$7,034             | \$204,362       | \$0   | \$2,542           | \$444,386       | \$0   | \$4,050             | \$707,917       | \$0   | \$0               | \$3,793         | \$0   | \$0                 | \$6,637         | \$0   | \$1,512,845  |
| 19           | 10          | \$4,396           | \$127,701       | \$0   | \$7,033             | \$204,321       | \$0   | \$2,542           | \$444,297       | \$0   | \$4,049             | \$707,775       | \$0   | \$0               | \$3,792         | \$0   | \$0                 | \$6,636         | \$0   | \$1,512,542  |

**DISCOUNTED**

**No Vaccination**

| age (year)   | age (month) | DF                |                 |       |                     |                 |       | DHF               |                 |       |                     |                 |       | DSS               |                 |       |                     |                 |       | total        |
|--------------|-------------|-------------------|-----------------|-------|---------------------|-----------------|-------|-------------------|-----------------|-------|---------------------|-----------------|-------|-------------------|-----------------|-------|---------------------|-----------------|-------|--------------|
|              |             | primary infection |                 |       | secondary infection |                 |       | primary infection |                 |       | secondary infection |                 |       | primary infection |                 |       | secondary infection |                 |       |              |
|              |             | outpatient        | hospitalization | death | outpatient          | hospitalization | death | outpatient        | hospitalization | death | outpatient          | hospitalization | death | outpatient        | hospitalization | death | outpatient          | hospitalization | death |              |
| <b>TOTAL</b> |             | \$46,518          | \$1,351,437     | \$0   | \$74,430            | \$2,162,300     | \$0   | \$26,899          | \$4,701,922     | \$0   | \$42,851            | \$7,490,271     | \$0   | \$0               | \$40,129        | \$0   | \$0                 | \$70,227        | \$0   | \$16,006,984 |
| 9            | -           | \$4,886           | \$141,939       | \$0   | \$7,817             | \$227,103       | \$0   | \$2,825           | \$493,835       | \$0   | \$4,501             | \$786,691       | \$0   | \$0               | \$4,215         | \$0   | \$0                 | \$7,376         | \$0   | \$1,681,187  |
| 10           | 1           | \$4,743           | \$137,777       | \$0   | \$7,588             | \$220,444       | \$0   | \$2,742           | \$479,356       | \$0   | \$4,369             | \$763,625       | \$0   | \$0               | \$4,091         | \$0   | \$0                 | \$7,160         | \$0   | \$1,631,894  |
| 11           | 2           | \$4,603           | \$133,738       | \$0   | \$7,366             | \$213,980       | \$0   | \$2,662           | \$465,301       | \$0   | \$4,241             | \$741,235       | \$0   | \$0               | \$3,971         | \$0   | \$0                 | \$6,950         | \$0   | \$1,584,046  |
| 12           | 3           | \$4,468           | \$129,817       | \$0   | \$7,150             | \$207,706       | \$0   | \$2,584           | \$451,658       | \$0   | \$4,116             | \$719,502       | \$0   | \$0               | \$3,855         | \$0   | \$0                 | \$6,746         | \$0   | \$1,537,601  |
| 13           | 4           | \$4,337           | \$126,010       | \$0   | \$6,940             | \$201,616       | \$0   | \$2,508           | \$438,415       | \$0   | \$3,996             | \$698,405       | \$0   | \$0               | \$3,742         | \$0   | \$0                 | \$6,548         | \$0   | \$1,492,518  |
| 14           | 5           | \$4,210           | \$122,316       | \$0   | \$6,736             | \$195,705       | \$0   | \$2,435           | \$425,561       | \$0   | \$3,878             | \$677,928       | \$0   | \$0               | \$3,632         | \$0   | \$0                 | \$6,356         | \$0   | \$1,448,757  |
| 15           | 6           | \$4,087           | \$118,729       | \$0   | \$6,539             | \$189,967       | \$0   | \$2,363           | \$413,083       | \$0   | \$3,765             | \$668,051       | \$0   | \$0               | \$3,526         | \$0   | \$0                 | \$6,170         | \$0   | \$1,406,279  |
| 16           | 7           | \$3,967           | \$115,248       | \$0   | \$6,347             | \$184,397       | \$0   | \$2,294           | \$400,971       | \$0   | \$3,654             | \$658,757       | \$0   | \$0               | \$3,422         | \$0   | \$0                 | \$5,989         | \$0   | \$1,365,046  |
| 17           | 8           | \$3,851           | \$111,869       | \$0   | \$6,161             | \$178,990       | \$0   | \$2,227           | \$389,215       | \$0   | \$3,547             | \$650,028       | \$0   | \$0               | \$3,322         | \$0   | \$0                 | \$5,813         | \$0   | \$1,325,023  |
| 18           | 9           | \$3,738           | \$108,589       | \$0   | \$5,980             | \$173,742       | \$0   | \$2,161           | \$377,803       | \$0   | \$3,443             | \$641,849       | \$0   | \$0               | \$3,224         | \$0   | \$0                 | \$5,643         | \$0   | \$1,286,172  |
| 19           | 10          | \$3,628           | \$105,405       | \$0   | \$5,805             | \$168,648       | \$0   | \$2,098           | \$366,725       | \$0   | \$3,342             | \$634,202       | \$0   | \$0               | \$3,130         | \$0   | \$0                 | \$5,477         | \$0   | \$1,248,461  |

**Vaccination**

| age (year)   | age (month) | DF                |                 |       |                     |                 |       | DHF               |                 |       |                     |                 |       | DSS               |                 |       |                     |                 |       | total        |
|--------------|-------------|-------------------|-----------------|-------|---------------------|-----------------|-------|-------------------|-----------------|-------|---------------------|-----------------|-------|-------------------|-----------------|-------|---------------------|-----------------|-------|--------------|
|              |             | primary infection |                 |       | secondary infection |                 |       | primary infection |                 |       | secondary infection |                 |       | primary infection |                 |       | secondary infection |                 |       |              |
|              |             | outpatient        | hospitalization | death | outpatient          | hospitalization | death | outpatient        | hospitalization | death | outpatient          | hospitalization | death | outpatient        | hospitalization | death | outpatient          | hospitalization | death |              |
| <b>TOTAL</b> |             | \$32,140          | \$933,729       | \$0   | \$51,425            | \$1,493,967     | \$0   | \$18,585          | \$3,248,632     | \$0   | \$29,607            | \$5,175,146     | \$0   | \$0               | \$27,726        | \$0   | \$0                 | \$48,521        | \$0   | \$11,059,478 |
| 9            | -           | \$3,376           | \$98,068        | \$0   | \$5,401             | \$156,909       | \$0   | \$1,952           | \$341,198       | \$0   | \$3,110             | \$543,537       | \$0   | \$0               | \$2,912         | \$0   | \$0                 | \$5,096         | \$0   | \$1,161,558  |
| 10           | 1           | \$3,277           | \$95,193        | \$0   | \$5,243             | \$152,308       | \$0   | \$1,895           | \$331,194       | \$0   | \$3,018             | \$527,600       | \$0   | \$0               | \$2,827         | \$0   | \$0                 | \$4,947         | \$0   | \$1,127,501  |
| 11           | 2           | \$3,181           | \$92,402        | \$0   | \$5,089             | \$147,842       | \$0   | \$1,839           | \$321,484       | \$0   | \$2,930             | \$512,131       | \$0   | \$0               | \$2,744         | \$0   | \$0                 | \$4,802         | \$0   | \$1,094,442  |
| 12           | 3           | \$3,087           | \$89,692        | \$0   | \$4,940             | \$143,508       | \$0   | \$1,785           | \$312,058       | \$0   | \$2,844             | \$497,115       | \$0   | \$0               | \$2,663         | \$0   | \$0                 | \$4,661         | \$0   | \$1,062,353  |
| 13           | 4           | \$2,997           | \$87,062        | \$0   | \$4,795             | \$139,300       | \$0   | \$1,733           | \$302,908       | \$0   | \$2,761             | \$482,539       | \$0   | \$0               | \$2,585         | \$0   | \$0                 | \$4,524         | \$0   | \$1,031,204  |
| 14           | 5           | \$2,909           | \$84,510        | \$0   | \$4,654             | \$135,216       | \$0   | \$1,682           | \$294,027       | \$0   | \$2,680             | \$468,391       | \$0   | \$0               | \$2,509         | \$0   | \$0                 | \$4,391         | \$0   | \$1,000,969  |
| 15           | 6           | \$2,824           | \$82,032        | \$0   | \$4,518             | \$131,251       | \$0   | \$1,633           | \$285,406       | \$0   | \$2,601             | \$454,658       | \$0   | \$0               | \$2,436         | \$0   | \$0                 | \$4,263         | \$0   | \$971,260    |
| 16           | 7           | \$2,741           | \$79,627        | \$0   | \$4,385             | \$127,403       | \$0   | \$1,585           | \$277,037       | \$0   | \$2,525             | \$441,327       | \$0   | \$0               | \$2,364         | \$0   | \$0                 | \$4,138         | \$0   | \$943,132    |
| 17           | 8           | \$2,661           | \$77,292        | \$0   | \$4,257             | \$123,667       | \$0   | \$1,538           | \$268,915       | \$0   | \$2,451             | \$428,387       | \$0   | \$0               | \$2,295         | \$0   | \$0                 | \$4,016         | \$0   | \$915,479    |
| 18           | 9           | \$2,582           | \$75,026        | \$0   | \$4,132             | \$120,041       | \$0   | \$1,493           | \$261,030       | \$0   | \$2,379             | \$415,827       | \$0   | \$0               | \$2,228         | \$0   | \$0                 | \$3,899         | \$0   | \$888,637    |
| 19           | 10          | \$2,507           | \$72,826        | \$0   | \$4,011             | \$116,522       | \$0   | \$1,450           | \$253,376       | \$0   | \$2,309             | \$403,634       | \$0   | \$0               | \$2,162         | \$0   | \$0                 | \$3,784         | \$0   | \$862,582    |
