# Supplementary material for: Cost-effectiveness and budget impact analyses of dengue vaccination in Indonesia
Source: PubMed Central journal article supplement (PMC8384188; doi:10.1371/journal.pntd.0009664), 2021-08-12
Supplement: pntd.0009664.s005.pdf [file pntd.0009664.s005.pdf]

| age (year) | age (month) | Vaccinate?   | Vaccination Cost     |                      |
|------------|-------------|--------------|----------------------|----------------------|
|            |             |              | UNDISCOUNTED         | DISCOUNTED           |
|            |             | <b>TOTAL</b> | <b>\$441,180,274</b> | <b>\$334,437,563</b> |
| 9          | -           | 1.00         | \$147,074,797        | \$112,720,586        |
| 9          | 0.5         | 1.00         | \$147,060,091        | \$112,570,585        |
| 10         | 1           | 1.00         | \$147,045,385        | \$109,146,392        |
| 11         | 2           | N            | \$0                  | \$0                  |
| 12         | 3           | N            | \$0                  | \$0                  |
| 13         | 4           | N            | \$0                  | \$0                  |
| 14         | 5           | N            | \$0                  | \$0                  |
| 15         | 6           | N            | \$0                  | \$0                  |
| 16         | 7           | N            | \$0                  | \$0                  |
| 17         | 8           | N            | \$0                  | \$0                  |
| 18         | 9           | N            | \$0                  | \$0                  |
| 19         | 10          | N            | \$0                  | \$0                  |

*cohort size \* vaccine coverage \* cost/dose*
