# Supplementary material for: Cost-effectiveness and budget impact analyses of dengue vaccination in Indonesia
Source: PubMed Central journal article supplement (PMC8384188; doi:10.1371/journal.pntd.0009664), 2021-08-12
Supplement: pntd.0009664.s006.pdf [file pntd.0009664.s006.pdf]

UNDISCOUNTED

No Vaccination

| age (year) | age (month) | DF                |                 |           |                     |                 |           | DHF               |                 |           |                     |                 |           | DSS               |                 |       |                     |                 |       | total non-fatal | total fatal |      |      |       |            |           |           |
|------------|-------------|-------------------|-----------------|-----------|---------------------|-----------------|-----------|-------------------|-----------------|-----------|---------------------|-----------------|-----------|-------------------|-----------------|-------|---------------------|-----------------|-------|-----------------|-------------|------|------|-------|------------|-----------|-----------|
|            |             | primary infection |                 |           | secondary infection |                 |           | primary infection |                 |           | secondary infection |                 |           | primary infection |                 |       | secondary infection |                 |       |                 |             |      |      |       |            |           |           |
|            |             | outpatient        | hospitalization | death     | outpatient          | hospitalization | death     | outpatient        | hospitalization | death     | outpatient          | hospitalization | death     | outpatient        | hospitalization | death | outpatient          | hospitalization | death |                 |             |      |      |       |            |           |           |
| TOTAL      |             | 4.76              | 1.64            | 58,852.83 | 7.62                | 2.62            | 95,522.81 | 2.75              | 5.70            | 46,448.39 | 4.39                | 9.09            | 75,060.68 | 0.00              | 0.05            | 0.00  | 0.00                | 0.00            | 0.00  | 0.00            | 0.00        | 0.00 | 0.00 | 38.72 | 275,884.71 |           |           |
| 9          | -           | 0.43              | 0.15            | 5,805.81  | 0.69                | 0.24            | 9,289.29  | 0.25              | 0.52            | 4,582.11  | 0.40                | 0.83            | 7,299.41  | 0.00              | 0.00            | 0.00  | 0.00                | 0.00            | 0.00  | 0.00            | 0.00        | 0.00 | 0.00 | 0.00  | 3.52       | 26,976.62 |           |
| 10         | 1           | 0.43              | 0.15            | 5,714.18  | 0.69                | 0.24            | 9,215.06  | 0.25              | 0.52            | 4,509.80  | 0.40                | 0.83            | 7,241.09  | 0.00              | 0.00            | 0.00  | 0.00                | 0.00            | 0.00  | 0.00            | 0.00        | 0.00 | 0.00 | 0.00  | 0.00       | 3.52      | 26,680.14 |
| 11         | 2           | 0.43              | 0.15            | 5,622.55  | 0.69                | 0.24            | 9,140.87  | 0.25              | 0.52            | 4,437.48  | 0.40                | 0.83            | 7,182.78  | 0.00              | 0.00            | 0.00  | 0.00                | 0.00            | 0.00  | 0.00            | 0.00        | 0.00 | 0.00 | 0.00  | 0.00       | 3.52      | 26,383.68 |
| 12         | 3           | 0.43              | 0.15            | 5,530.91  | 0.69                | 0.24            | 8,994.28  | 0.25              | 0.52            | 4,365.16  | 0.40                | 0.83            | 7,067.60  | 0.00              | 0.00            | 0.00  | 0.00                | 0.00            | 0.00  | 0.00            | 0.00        | 0.00 | 0.00 | 0.00  | 0.00       | 3.52      | 25,957.95 |
| 13         | 4           | 0.43              | 0.15            | 5,439.28  | 0.69                | 0.24            | 8,847.69  | 0.25              | 0.52            | 4,292.84  | 0.40                | 0.83            | 6,952.41  | 0.00              | 0.00            | 0.00  | 0.00                | 0.00            | 0.00  | 0.00            | 0.00        | 0.00 | 0.00 | 0.00  | 0.00       | 3.52      | 25,532.23 |
| 14         | 5           | 0.43              | 0.15            | 5,347.65  | 0.69                | 0.24            | 8,701.11  | 0.25              | 0.52            | 4,220.52  | 0.40                | 0.83            | 6,837.23  | 0.00              | 0.00            | 0.00  | 0.00                | 0.00            | 0.00  | 0.00            | 0.00        | 0.00 | 0.00 | 0.00  | 0.00       | 3.52      | 25,106.51 |
| 15         | 6           | 0.43              | 0.15            | 5,256.02  | 0.69                | 0.24            | 8,554.53  | 0.25              | 0.52            | 4,148.20  | 0.40                | 0.83            | 6,722.05  | 0.00              | 0.00            | 0.00  | 0.00                | 0.00            | 0.00  | 0.00            | 0.00        | 0.00 | 0.00 | 0.00  | 0.00       | 3.52      | 24,680.80 |
| 16         | 7           | 0.43              | 0.15            | 5,164.39  | 0.69                | 0.24            | 8,407.95  | 0.25              | 0.52            | 4,075.89  | 0.40                | 0.83            | 6,606.87  | 0.00              | 0.00            | 0.00  | 0.00                | 0.00            | 0.00  | 0.00            | 0.00        | 0.00 | 0.00 | 0.00  | 0.00       | 3.52      | 24,260.30 |
| 17         | 8           | 0.43              | 0.15            | 5,072.76  | 0.69                | 0.24            | 8,261.37  | 0.25              | 0.52            | 4,003.57  | 0.40                | 0.83            | 6,491.69  | 0.00              | 0.00            | 0.00  | 0.00                | 0.00            | 0.00  | 0.00            | 0.00        | 0.00 | 0.00 | 0.00  | 0.00       | 3.52      | 23,840.05 |
| 18         | 9           | 0.43              | 0.15            | 4,981.13  | 0.69                | 0.24            | 8,114.79  | 0.25              | 0.52            | 3,931.25  | 0.40                | 0.83            | 6,376.51  | 0.00              | 0.00            | 0.00  | 0.00                | 0.00            | 0.00  | 0.00            | 0.00        | 0.00 | 0.00 | 0.00  | 0.00       | 3.52      | 23,420.05 |
| 19         | 10          | 0.43              | 0.15            | 4,889.50  | 0.69                | 0.24            | 7,968.21  | 0.25              | 0.52            | 3,858.93  | 0.40                | 0.83            | 6,261.33  | 0.00              | 0.00            | 0.00  | 0.00                | 0.00            | 0.00  | 0.00            | 0.00        | 0.00 | 0.00 | 0.00  | 0.00       | 3.52      | 23,000.05 |

Vaccination

| age (year) | age (month) | DF                |                 |           |                     |                 |           | DHF               |                 |           |                     |                 |           | DSS               |                 |       |                     |                 |       | total non-fatal | total fatal |      |      |      |       |            |           |
|------------|-------------|-------------------|-----------------|-----------|---------------------|-----------------|-----------|-------------------|-----------------|-----------|---------------------|-----------------|-----------|-------------------|-----------------|-------|---------------------|-----------------|-------|-----------------|-------------|------|------|------|-------|------------|-----------|
|            |             | primary infection |                 |           | secondary infection |                 |           | primary infection |                 |           | secondary infection |                 |           | primary infection |                 |       | secondary infection |                 |       |                 |             |      |      |      |       |            |           |
|            |             | outpatient        | hospitalization | death     | outpatient          | hospitalization | death     | outpatient        | hospitalization | death     | outpatient          | hospitalization | death     | outpatient        | hospitalization | death | outpatient          | hospitalization | death |                 |             |      |      |      |       |            |           |
| TOTAL      |             | 3.29              | 1.13            | 40,662.35 | 5.27                | 1.81            | 65,998.22 | 1.90              | 3.94            | 32,091.93 | 3.03                | 6.28            | 51,860.61 | 0.00              | 0.03            | 0.00  | 0.00                | 0.00            | 0.00  | 0.00            | 0.00        | 0.00 | 0.00 | 0.00 | 26.75 | 190,613.10 |           |
| 9          | -           | 0.30              | 0.10            | 4,011.32  | 0.48                | 0.16            | 6,418.12  | 0.17              | 0.36            | 3,165.85  | 0.28                | 0.57            | 5,043.28  | 0.00              | 0.00            | 0.00  | 0.00                | 0.00            | 0.00  | 0.00            | 0.00        | 0.00 | 0.00 | 0.00 | 0.00  | 2.43       | 18,638.57 |
| 10         | 1           | 0.30              | 0.10            | 3,948.02  | 0.48                | 0.16            | 6,366.83  | 0.17              | 0.36            | 3,115.89  | 0.28                | 0.57            | 5,002.98  | 0.00              | 0.00            | 0.00  | 0.00                | 0.00            | 0.00  | 0.00            | 0.00        | 0.00 | 0.00 | 0.00 | 0.00  | 2.43       | 18,433.73 |
| 11         | 2           | 0.30              | 0.10            | 3,884.71  | 0.48                | 0.16            | 6,315.57  | 0.17              | 0.36            | 3,065.93  | 0.28                | 0.57            | 4,962.70  | 0.00              | 0.00            | 0.00  | 0.00                | 0.00            | 0.00  | 0.00            | 0.00        | 0.00 | 0.00 | 0.00 | 0.00  | 2.43       | 18,228.90 |
| 12         | 3           | 0.30              | 0.10            | 3,821.40  | 0.48                | 0.16            | 6,264.29  | 0.17              | 0.36            | 3,015.96  | 0.28                | 0.57            | 4,922.42  | 0.00              | 0.00            | 0.00  | 0.00                | 0.00            | 0.00  | 0.00            | 0.00        | 0.00 | 0.00 | 0.00 | 0.00  | 2.43       | 17,994.76 |
| 13         | 4           | 0.30              | 0.10            | 3,758.09  | 0.48                | 0.16            | 6,213.01  | 0.17              | 0.36            | 2,965.99  | 0.28                | 0.57            | 4,882.14  | 0.00              | 0.00            | 0.00  | 0.00                | 0.00            | 0.00  | 0.00            | 0.00        | 0.00 | 0.00 | 0.00 | 0.00  | 2.43       | 17,760.62 |
| 14         | 5           | 0.30              | 0.10            | 3,694.78  | 0.48                | 0.16            | 6,161.73  | 0.17              | 0.36            | 2,916.02  | 0.28                | 0.57            | 4,841.86  | 0.00              | 0.00            | 0.00  | 0.00                | 0.00            | 0.00  | 0.00            | 0.00        | 0.00 | 0.00 | 0.00 | 0.00  | 2.43       | 17,526.48 |
| 15         | 6           | 0.30              | 0.10            | 3,631.47  | 0.48                | 0.16            | 6,110.45  | 0.17              | 0.36            | 2,866.06  | 0.28                | 0.57            | 4,801.58  | 0.00              | 0.00            | 0.00  | 0.00                | 0.00            | 0.00  | 0.00            | 0.00        | 0.00 | 0.00 | 0.00 | 0.00  | 2.43       | 17,292.34 |
| 16         | 7           | 0.30              | 0.10            | 3,568.16  | 0.48                | 0.16            | 6,059.17  | 0.17              | 0.36            | 2,816.08  | 0.28                | 0.57            | 4,761.30  | 0.00              | 0.00            | 0.00  | 0.00                | 0.00            | 0.00  | 0.00            | 0.00        | 0.00 | 0.00 | 0.00 | 0.00  | 2.43       | 17,058.20 |
| 17         | 8           | 0.30              | 0.10            | 3,504.85  | 0.48                | 0.16            | 6,007.89  | 0.17              | 0.36            | 2,771.13  | 0.28                | 0.57            | 4,721.02  | 0.00              | 0.00            | 0.00  | 0.00                | 0.00            | 0.00  | 0.00            | 0.00        | 0.00 | 0.00 | 0.00 | 0.00  | 2.43       | 16,824.06 |
| 18         | 9           | 0.30              | 0.10            | 3,441.54  | 0.48                | 0.16            | 5,956.61  | 0.17              | 0.36            | 2,726.06  | 0.28                | 0.57            | 4,680.74  | 0.00              | 0.00            | 0.00  | 0.00                | 0.00            | 0.00  | 0.00            | 0.00        | 0.00 | 0.00 | 0.00 | 0.00  | 2.43       | 16,589.92 |
| 19         | 10          | 0.30              | 0.10            | 3,378.23  | 0.48                | 0.16            | 5,905.33  | 0.17              | 0.36            | 2,680.99  | 0.28                | 0.57            | 4,640.46  | 0.00              | 0.00            | 0.00  | 0.00                | 0.00            | 0.00  | 0.00            | 0.00        | 0.00 | 0.00 | 0.00 | 0.00  | 2.43       | 16,355.78 |

DISCOUNTED

No Vaccination

| age (year) | age (month) | DF                |                 |           |                     |                 |           | DHF               |                 |           |                     |                 |           | DSS               |                 |       |                     |                 |       | total non-fatal | total fatal |      |      |      |       |            |           |
|------------|-------------|-------------------|-----------------|-----------|---------------------|-----------------|-----------|-------------------|-----------------|-----------|---------------------|-----------------|-----------|-------------------|-----------------|-------|---------------------|-----------------|-------|-----------------|-------------|------|------|------|-------|------------|-----------|
|            |             | primary infection |                 |           | secondary infection |                 |           | primary infection |                 |           | secondary infection |                 |           | primary infection |                 |       | secondary infection |                 |       |                 |             |      |      |      |       |            |           |
|            |             | outpatient        | hospitalization | death     | outpatient          | hospitalization | death     | outpatient        | hospitalization | death     | outpatient          | hospitalization | death     | outpatient        | hospitalization | death | outpatient          | hospitalization | death |                 |             |      |      |      |       |            |           |
| TOTAL      |             | 3.16              | 1.09            | 39,274.15 | 5.06                | 1.74            | 63,721.09 | 1.83              | 3.79            | 30,996.32 | 2.91                | 6.03            | 50,071.27 | 0.00              | 0.03            | 0.00  | 0.00                | 0.00            | 0.00  | 0.00            | 0.00        | 0.00 | 0.00 | 0.00 | 25.71 | 184,062.83 |           |
| 9          | -           | 0.33              | 0.11            | 4,449.67  | 0.53                | 0.18            | 7,119.47  | 0.19              | 0.40            | 3,511.81  | 0.31                | 0.63            | 5,594.39  | 0.00              | 0.00            | 0.00  | 0.00                | 0.00            | 0.00  | 0.00            | 0.00        | 0.00 | 0.00 | 0.00 | 0.00  | 2.70       | 20,675.33 |
| 10         | 1           | 0.32              | 0.11            | 4,251.89  | 0.52                | 0.18            | 6,856.87  | 0.19              | 0.39            | 3,355.72  | 0.30                | 0.62            | 5,388.05  | 0.00              | 0.00            | 0.00  | 0.00                | 0.00            | 0.00  | 0.00            | 0.00        | 0.00 | 0.00 | 0.00 | 0.00  | 2.62       | 19,852.53 |
| 11         | 2           | 0.31              | 0.11            | 4,061.85  | 0.50                | 0.17            | 6,603.56  | 0.18              | 0.37            | 3,205.73  | 0.29                | 0.60            | 5,189.00  | 0.00              | 0.00            | 0.00  | 0.00                | 0.00            | 0.00  | 0.00            | 0.00        | 0.00 | 0.00 | 0.00 | 0.00  | 2.54       | 19,060.13 |
| 12         | 3           | 0.30              | 0.10            | 3,879.27  | 0.49                | 0.17            | 6,308.41  | 0.18              | 0.36            | 3,061.64  | 0.28                | 0.58            | 4,957.07  | 0.00              | 0.00            | 0.00  | 0.00                | 0.00            | 0.00  | 0.00            | 0.00        | 0.00 | 0.00 | 0.00 | 0.00  | 2.47       | 18,206.38 |
| 13         | 4           | 0.29              | 0.10            | 3,703.89  | 0.47                | 0.16            | 6,024.85  | 0.17              | 0.35            | 2,923.22  | 0.27                | 0.56            | 4,734.25  | 0.00              | 0.00            | 0.00  | 0.00                | 0.00            | 0.00  | 0.00            | 0.00        | 0.00 | 0.00 | 0.00 | 0.00  | 2.40       | 17,386.21 |
| 14         | 5           | 0.29              | 0.10            | 3,535.43  | 0.46                | 0.16            | 5,752.46  | 0.17              | 0.34            | 2,790.26  | 0.26                | 0.55            | 4,520.21  | 0.00              | 0.00            | 0.00  | 0.00                | 0.00            | 0.00  | 0.00            | 0.00        | 0.00 | 0.00 | 0.00 | 0.00  | 2.33       | 16,598.36 |
| 15         | 6           | 0.28              | 0.10            | 3,373.64  | 0.44                | 0.15            | 5,490.83  | 0.16              | 0.33            | 2,662.57  | 0.26                | 0.53            | 4,314.63  | 0.00              | 0.00            | 0.00  | 0.00                | 0.00            | 0.00  | 0.00            | 0.00        | 0.00 | 0.00 | 0.00 | 0.00  | 2.26       | 15,841.66 |
| 16         | 7           | 0.27              | 0.09            | 3,220.09  | 0.43                | 0.15            | 5,239.56  | 0.16              | 0.32            | 2,541.39  | 0.25                | 0.51            | 4,117.18  | 0.00              | 0.00            | 0.00  | 0.00                | 0.00            | 0.00  | 0.00            | 0.00        | 0.00 | 0.00 | 0.00 | 0.00  | 2.19       | 15,118.22 |
| 17         | 8           | 0.26              | 0.09            | 3,072.60  | 0.42                | 0.14            | 5,001.08  | 0.15              | 0.31            | 2,424.99  | 0.24                | 0.50            | 3,929.79  | 0.00              | 0.00            | 0.00  | 0.00                | 0.00            | 0.00  | 0.00            | 0.00        | 0.00 | 0.00 | 0.00 | 0.00  | 2.13       | 14,428.46 |
| 18         | 9           | 0.25              | 0.09            | 2,930.94  | 0.41                | 0.14            | 4,772.01  | 0.15              | 0.30            | 2,313.18  | 0.23                | 0.48            | 3,749.79  | 0.00              | 0.00            | 0.00  | 0.00                | 0.00            | 0.00  | 0.00            | 0.00        | 0.00 | 0.00 | 0.00 | 0.00  | 2.07       | 13,765.93 |
| 19         | 10          | 0.25              | 0.08            | 2,794.89  | 0.39                | 0.14            | 4,552.00  | 0.14              | 0.30            | 2,205.81  | 0.23                | 0.47            | 3,576.91  | 0.00              | 0.00            | 0.00  | 0.00                | 0.00            | 0.00  | 0.00            | 0.00        | 0.00 | 0.00 | 0.00 | 0.00  | 2.01       | 13,129.62 |

Vaccination

| age (year) | age (month) | DF                |  |  |                     |  |  | DHF               |  |  |                     |  |  | DSS               |  |  |                     |  |  | total non-fatal | total fatal |
|------------|-------------|-------------------|--|--|---------------------|--|--|-------------------|--|--|---------------------|--|--|-------------------|--|--|---------------------|--|--|-----------------|-------------|
|            |             | primary infection |  |  | secondary infection |  |  | primary infection |  |  | secondary infection |  |  | primary infection |  |  | secondary infection |  |  |                 |             |
|            |             |                   |  |  |                     |  |  |                   |  |  |                     |  |  |                   |  |  |                     |  |  |                 |             |
