# Supplementary material for: Cost-effectiveness and budget impact analyses of dengue vaccination in Indonesia
Source: PubMed Central journal article supplement (PMC8384188; doi:10.1371/journal.pntd.0009664), 2021-08-12
Supplement: pntd.0009664.s007.pdf [file pntd.0009664.s007.pdf]

| Outcomes per Cohort   | UNDISCOUNTED      |                   |                  | DISCOUNTED        |                   |                  |
|-----------------------|-------------------|-------------------|------------------|-------------------|-------------------|------------------|
|                       | Non Vaccine       | Vaccine           | Difference       | Non Vaccine       | Vaccine           | Difference       |
| <b>BURDEN</b>         | <b>575,885</b>    | <b>397,890</b>    | <b>177,996</b>   | <b>382,416</b>    | <b>264,217</b>    | <b>118,199</b>   |
| DF (outpatient)       | 295,973           | 204,492           | 91,481           | 196,540           | 135,793           | 60,748           |
| DF (hospitalization)  | 23,214            | 16,039            | 7,175            | 15,415            | 10,650            | 4,765            |
| DF (fatal)            | 2,649             | 1,830             | 819              | 1,759             | 1,215             | 544              |
| DHF (outpatient)      | 170,687           | 117,931           | 52,757           | 113,345           | 78,312            | 35,033           |
| DHF (hospitalization) | 80,548            | 55,652            | 24,896           | 53,488            | 36,956            | 16,532           |
| DHF (fatal)           | 2,085             | 1,441             | 645              | 1,385             | 957               | 428              |
| DSS (outpatient)      | 0                 | 0                 | 0                | 0                 | 0                 | 0                |
| DSS (hospitalization) | 729               | 504               | 225              | 484               | 334               | 150              |
| DSS (fatal)           | 0                 | 0                 | 0                | 0                 | 0                 | 0                |
| <b>QALYs LOST</b>     | <b>275,923.42</b> | <b>190,639.85</b> | <b>85,283.57</b> | <b>184,088.54</b> | <b>127,189.68</b> | <b>56,898.86</b> |
| Non-fatal             | 38.72             | 26.75             | 11.97            | 25.71             | 17.76             | 7.95             |
| Fatal                 | 275,884.71        | 190,613.10        | 85,271.61        | 184,062.83        | 127,171.92        | 56,890.91        |

| Outcomes per Cohort | UNDISCOUNTED |               |                  | DISCOUNTED   |               |                  |
|---------------------|--------------|---------------|------------------|--------------|---------------|------------------|
|                     | Non Vaccine  | Vaccine       | Difference       | Non Vaccine  | Vaccine       | Difference       |
| <b>HEALTHCARE</b>   |              |               |                  |              |               |                  |
| Vaccine cost        | \$0          | \$441,180,274 | -\$441,180,274   | \$0          | \$334,437,563 | -\$334,437,563   |
| Treatment cost      | \$40,085,623 | \$27,695,790  | \$12,389,833     | \$26,618,814 | \$18,391,359  | \$8,227,455      |
| Total               | \$40,085,623 | \$468,876,064 | -\$428,790,441   | \$26,618,814 | \$352,828,922 | -\$326,210,108   |
| Cost/QALY gained    |              |               | <b>\$5,028</b>   |              |               | <b>\$5,733</b>   |
| Cost/life saved     |              |               | <b>\$293,323</b> |              |               | <b>\$335,696</b> |
| <b>PAYER</b>        |              |               |                  |              |               |                  |
| Vaccine cost        | \$0          | \$441,180,274 | -\$441,180,274   | \$0          | \$334,437,563 | -\$334,437,563   |
| Treatment cost      | \$24,105,129 | \$16,654,614  | \$7,450,515      | \$16,006,984 | \$11,059,478  | \$4,947,506      |
| Total               | \$24,105,129 | \$457,834,888 | -\$433,729,759   | \$16,006,984 | \$345,497,041 | -\$329,490,057   |
| Cost/QALY gained    |              |               | <b>\$5,086</b>   |              |               | <b>\$5,791</b>   |
| Cost/life saved     |              |               | <b>\$296,701</b> |              |               | <b>\$339,071</b> |

| Level of Severity | 2020            | 2021  | 2022   | 2023   | 2024   | Total  |         |
|-------------------|-----------------|-------|--------|--------|--------|--------|---------|
| DF                | outpatient      | 5,678 | 21,733 | 31,578 | 53,286 | 60,748 | 173,023 |
|                   | hospitalization | 445   | 1,705  | 2,477  | 4,179  | 4,765  | 13,570  |
|                   | death           | 51    | 195    | 283    | 477    | 544    | 1,549   |
| DHF               | outpatient      | 3,274 | 12,534 | 18,211 | 30,730 | 35,033 | 99,782  |
|                   | hospitalization | 1,545 | 5,915  | 8,594  | 14,502 | 16,532 | 47,088  |
|                   | death           | 40    | 153    | 222    | 375    | 428    | 1,219   |
| DSS               | outpatient      | 0     | 0      | 0      | 0      | 0      | 0       |
|                   | hospitalization | 14    | 54     | 78     | 131    | 150    | 426     |
|                   | death           | 0     | 0      | 0      | 0      | 0      | 0       |

| Perspective | 2020      | 2021        | 2022        | 2023        | 2024        | Total        |
|-------------|-----------|-------------|-------------|-------------|-------------|--------------|
| Healthcare  | \$769,000 | \$2,943,480 | \$4,276,821 | \$7,216,940 | \$8,227,455 | \$23,433,695 |
| Payer       | \$462,431 | \$1,770,035 | \$2,571,828 | \$4,339,842 | \$4,947,506 | \$14,091,642 |
